# Supplementary material for: BMSC-derived Exosomes Protect Against Delayed Encephalopathy after Acute Carbon Monoxide Poisoning in Rats via Blockade of Notch Signaling
Source: Research Square preprint supplement (doi:10.21203/rs.3.rs-879944/v1), 2021-10-21
Supplement: Supplementary file 1 [file c141c7ecd0bddeae219357f8.docx]

Additional file of BMSC-derived exosomes protect against delayed encephalopathy after acute carbon monoxide poisoning in rats via blockade of Notch signaling


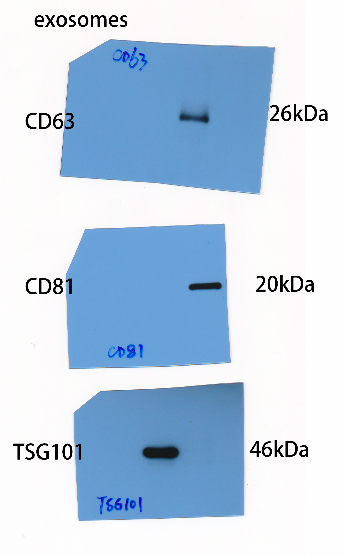


Supplementary Figure S1 related to Figure1. Western blot analysis of expression of CD63, CD81, and TSG101 in exosome excreted from BMSCs.


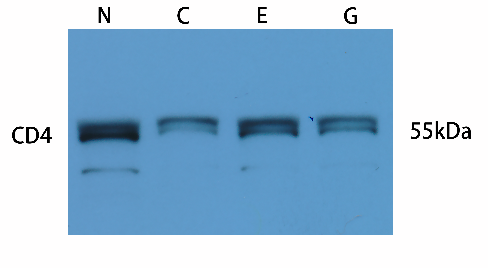


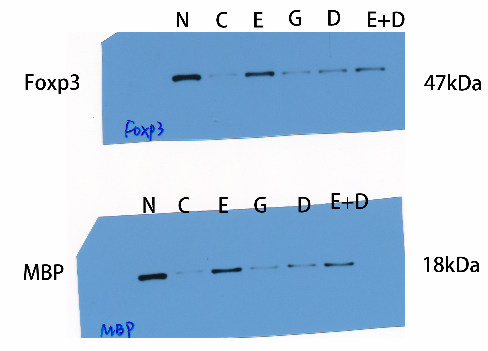


Supplementary Figure S2 related to Figure3, Figure5, and Figure6. Western blot analysis of expression of CD4, Foxp3 and MBP from NC, CO, exosome, GW4869, DAPT and exosome +DAPT mice.


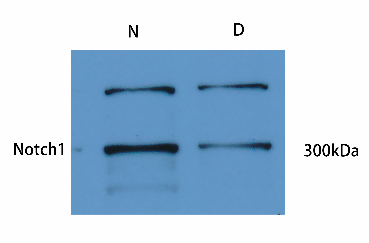


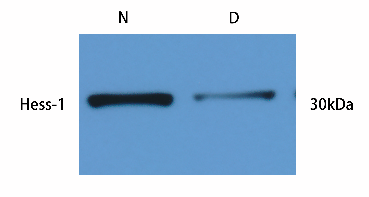


Supplementary Figure S3 related to Figure6. Western blot analysis of expression of Notch1 and Hess-1 from NC and DAPT mice.
